# Supplementary material for: Irregular Dietary Habits with a High Intake of Cereals and Sweets Are Associated with More Severe Gastrointestinal Symptoms in IBS Patients
Source: PubMed Central journal article supplement (PMC6627681; doi:10.3390/nu11061279), 2019-06-05

**Supplementary Table S1.** Reasons for not being eligible for/declining study participation

| <b>Reasons for non-inclusion</b>            | <b>Number</b> |
|---------------------------------------------|---------------|
| Did not answer when calling                 | 188           |
| Did not want to participate                 | 157           |
| Wrong adress                                | 62            |
| Already on a diet in the exclusion criteria | 45            |
| No or mild symptoms                         | 37            |
| Another diagnosis                           | 27            |
| Moved from the region                       | 14            |
| Pregnancy                                   | 4             |

**Supplementary Table S2.** Recommendations of fruit intake according to a starch- and sucrose- reduced diet

| <b>Well tolerated</b> | <b>Tolerated by some</b> | <b>Not tolerated</b> |
|-----------------------|--------------------------|----------------------|
| Avocado               | Persimmons               | Apples               |
| Blackberries          | Plums                    | Apricots             |
| Blueberries           | Raisins                  | Bananas              |
| Boysenberries         | Watermelon               | Cantaloupe           |
| Cherries              |                          | Dates                |
| Cranberries           |                          | Grapefruits          |
| Currants              |                          | Guava                |
| Figs                  |                          | Honeydew melon       |
| Gooseberries          |                          | Mangos               |
| Grapes                |                          | Nectarines           |
| Kiwi fruits           |                          | Oranges              |
| Lemons                |                          | Passion fruits       |
| Limes                 |                          | Peaches              |
| Loganberries          |                          | Pineapples           |
| Olives                |                          | Tangelos             |
| Papayas               |                          | Tangerines           |
| Pears                 |                          |                      |
| Pomegranates          |                          |                      |
| Prunes                |                          |                      |
| Raspberries           |                          |                      |
| Rhubarbs              |                          |                      |
| Strawberries          |                          |                      |

Information from Ref No 9.

**Supplementary Table S3.** Recommendations of vegetable and legume intake according to a starch- and sucrose-reduced diet

| <b>Well tolerated</b> | <b>Tolerated by some</b> | <b>Not tolerated</b> |
|-----------------------|--------------------------|----------------------|
| Alfafa sprouts        | Edamame soybeans         | Beets                |
| Artichokes*           | Jicamas                  | Black beans          |
| Arugulas              | Leeks                    | Black-eyed peas      |
| Asparagus*            | Okra                     | Butternut            |
| Bamboo shoots         | Pumpkins                 | Carrots              |
| Bok choy              | Snow peas                | Cassavas             |
| Broccoli*             | Tempeh                   | Chickpeas            |
| Brussels sprouts*     | Tofu                     | Corn                 |
| Cabbages*             | Yellow wax beans         | Garlic               |
| Cauliflower*          |                          | Green peas           |
| Celery                |                          | Lentils              |
| Chard                 |                          | Kidney beans         |
| Chicories             |                          | Lima beans           |
| Chives                |                          | Navy beans           |
| Collard greens        |                          | Onion                |
| Cress                 |                          | Parsnips             |
| Cucumbers             |                          | Pinto beans          |
| Eggplants             |                          | Potatoes             |
| Endive                |                          | Soybeans             |
| Green beans           |                          | Split peas           |
| Kale                  |                          | Sweet potatoes       |
| Lettuces              |                          | Yams                 |
| Mung bean sprout      |                          |                      |
| Mushrooms             |                          |                      |
| Mustard green         |                          |                      |
| Peppers               |                          |                      |
| Radishes              |                          |                      |
| Spaghetti squash      |                          |                      |
| Spinach               |                          |                      |
| Tomatoes              |                          |                      |
| Turnips               |                          |                      |
| Yellow squash         |                          |                      |
| Zucchini              |                          |                      |

Information from Ref No 9.

**Supplementary Table S4.** Concomitant diseases besides irritable bowel syndrome (IBS) and drugs used as regular treatments

|                           |    |
|---------------------------|----|
| <b>Diseases</b>           |    |
| Allergy                   | 17 |
| Hypothyroidism            | 12 |
| Asthma bronchialis        | 11 |
| Depression                | 11 |
| Hypertension              | 10 |
| Migraine                  | 7  |
| Lactose intolerance       | 5  |
| Pain in back and joints   | 5  |
| <b>Drug treatment</b>     |    |
| Antidepressants           | 21 |
| Laxatives                 | 14 |
| Proton-pump inhibitor     | 13 |
| Levothyroxine             | 13 |
| Hormonal treatment        | 11 |
| Vitamin D                 | 11 |
| Statins                   | 8  |
| Folic acid                | 6  |
| Cobalamin                 | 5  |
| Inhaled asthma medication | 5  |

**Figure S1. CONSORT 2010 Flow Diagram**

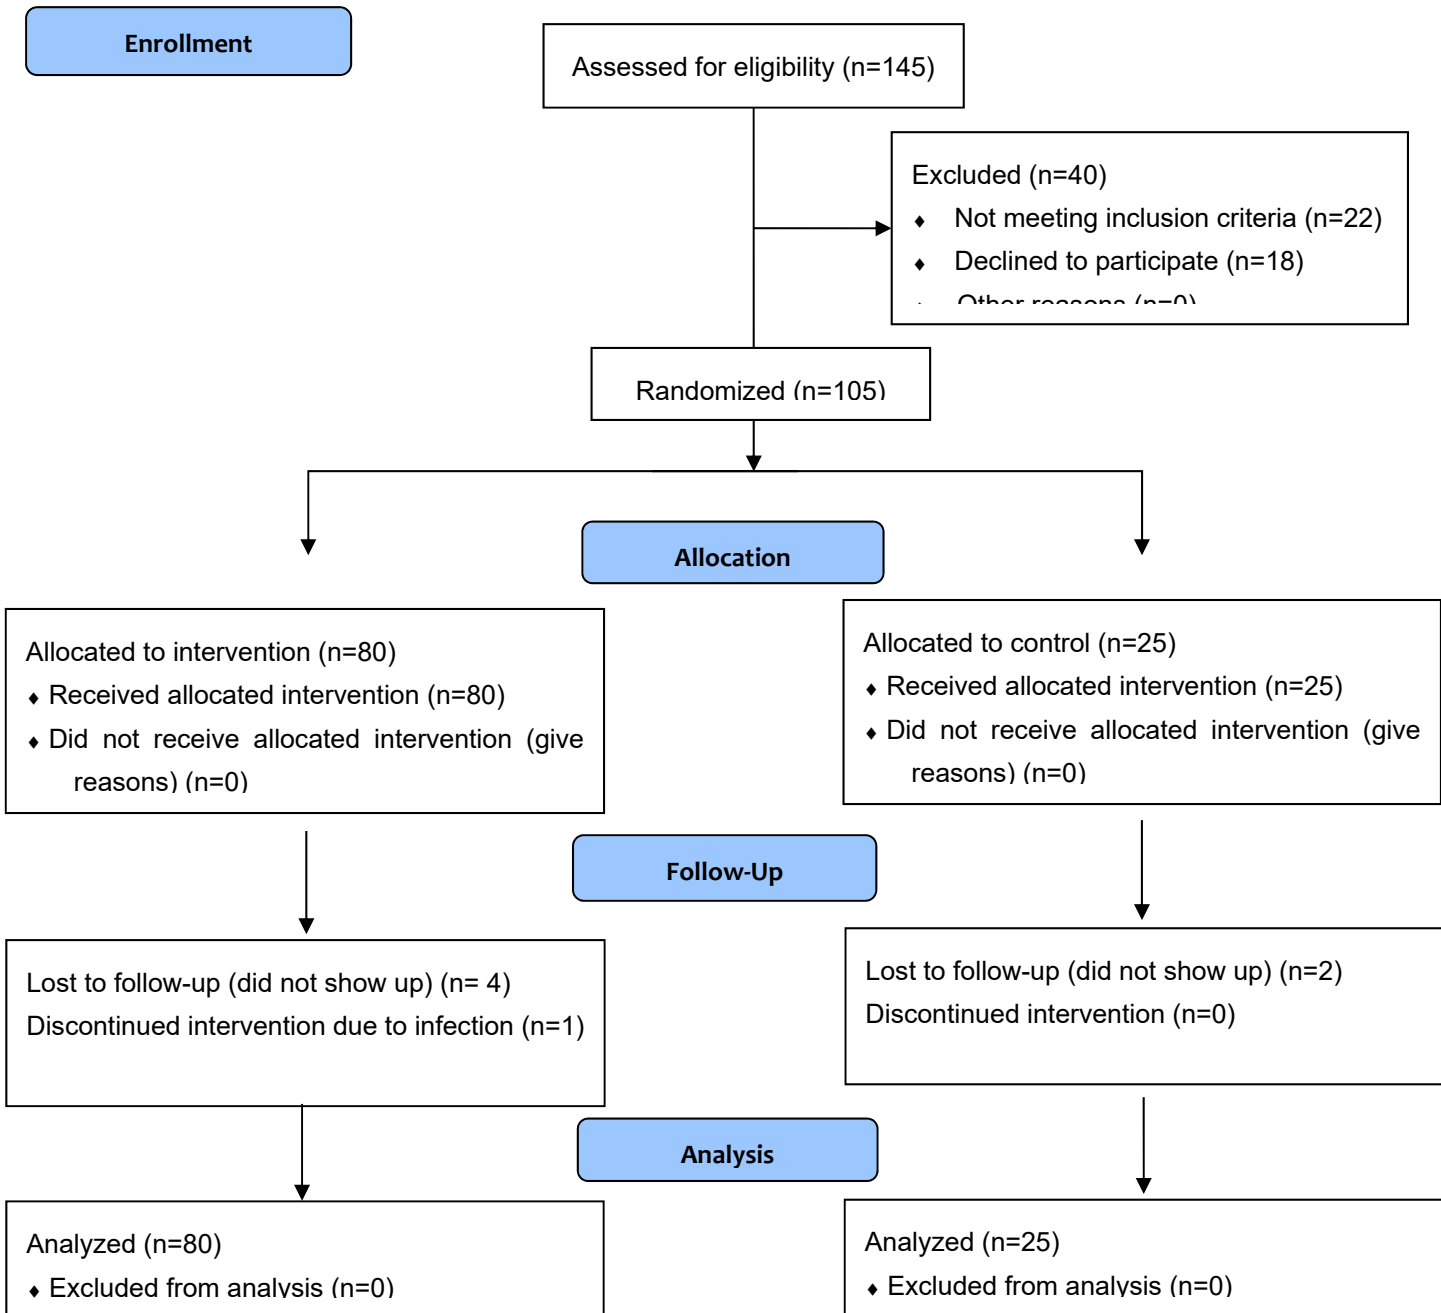

**Figure S2.** Flow chart over inclusion and exclusion criteria

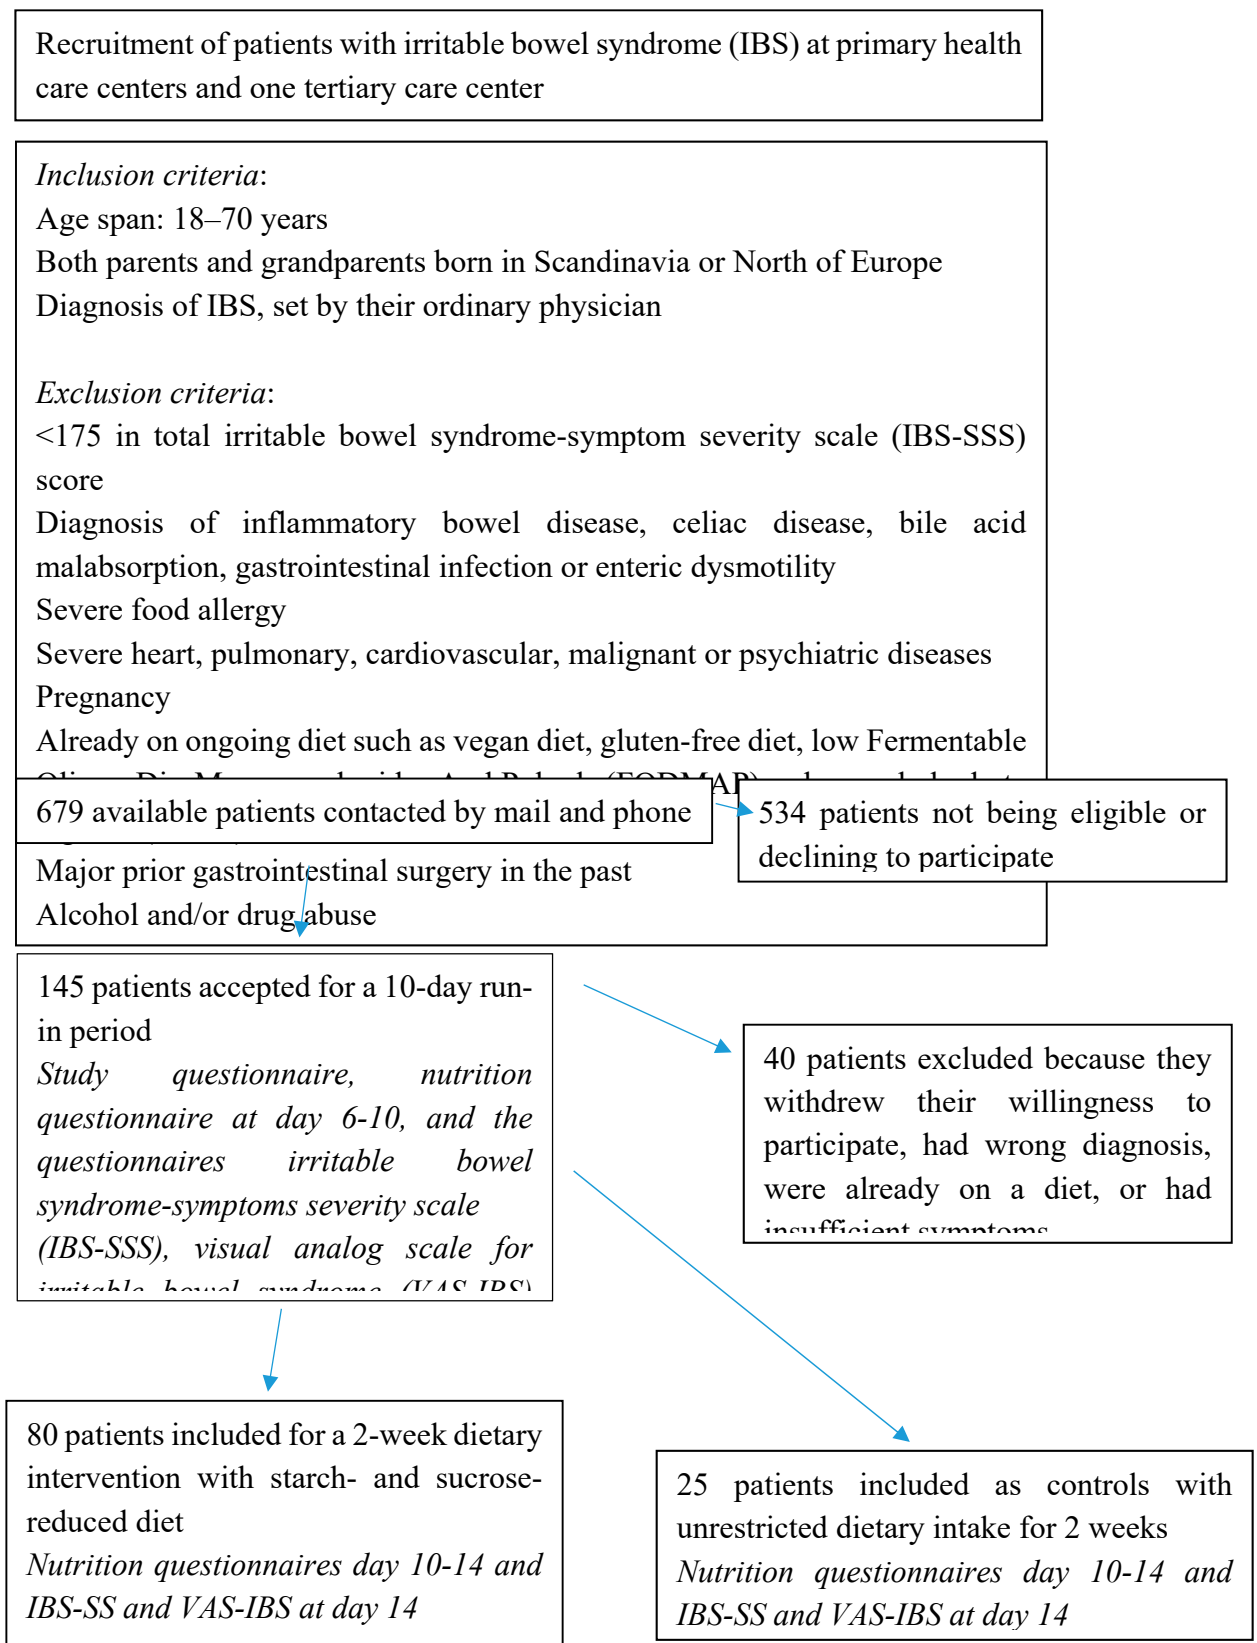

Supplement: nutrients-11-01279-s001.pdf [file nutrients-11-01279-s001.pdf]
